# Supplementary material for: Phytonutrients and outcomes following breast cancer: a systematic review and meta-analysis of observational studies
Source: PubMed Central journal article supplement (PMC10868383; doi:10.1093/jncics/pkad104), 2023-12-09
Supplement: pkad104_supplementary_data.pdf [file pkad104_supplementary_data.pdf]

Supplementary Table 1 Quality and risk of bias assessment on modified Newcastle-Ottawa Scale

| First author, year | S1: Exposed cohort representative | S2: Selection of low dose/non-exposed | S3: Exposure ascertainment | S4: Demonstrated outcome of interest | Total selection score: | C1: Controlled for specified primary | C2: Controlled for additional | Total comparability score: | O1: Assessment of outcome | O2: Follow-up long enough for outcome | O3: Adequacy of follow-up of cohort | Total outcome score: | Total NOS score |
|--------------------|-----------------------------------|---------------------------------------|----------------------------|--------------------------------------|------------------------|--------------------------------------|-------------------------------|----------------------------|---------------------------|---------------------------------------|-------------------------------------|----------------------|-----------------|
| Caan, 2011         | 1                                 | 1                                     | 1                          | 1                                    | 4                      | 1                                    | 1                             | 2                          | 1                         | 1                                     | 1                                   | 3                    | 9               |
| Guha, 2009         | 1                                 | 1                                     | 1                          | 1                                    | 4                      | 1                                    | 0                             | 1                          | 1                         | 1                                     | 1                                   | 3                    | 8               |
| Shu, 2009          | 1                                 | 1                                     | 1                          | 1                                    | 4                      | 1                                    | 1                             | 2                          | 1                         | 1                                     | 1                                   | 3                    | 9               |
| Nechuta, 2012      | 1                                 | 1                                     | 1                          | 1                                    | 4                      | 1                                    | 1                             | 2                          | 0                         | 1                                     | 1                                   | 2                    | 8               |
| Fink, 2007         | 1                                 | 1                                     | 1                          | 1                                    | 4                      | 1                                    | 0                             | 1                          | 1                         | 1                                     | 1                                   | 3                    | 8               |
| Boyapati, 2005     | 1                                 | 1                                     | 1                          | 1                                    | 4                      | 1                                    | 0                             | 1                          | 1                         | 1                                     | 1                                   | 3                    | 8               |
| Kang, 2010         | 1                                 | 1                                     | 1                          | 0                                    | 3                      | 1                                    | 1                             | 2                          | 1                         | 1                                     | 1                                   | 3                    | 8               |
| Zhang, 2012        | 1                                 | 1                                     | 0                          | 0                                    | 2                      | 1                                    | 0                             | 1                          | 0                         | 1                                     | 1                                   | 2                    | 5               |
| Kang, 2012         | 1                                 | 1                                     | 1                          | 0                                    | 3                      | 1                                    | 0                             | 1                          | 0                         | 1                                     | 1                                   | 2                    | 6               |
| Conroy, 2013       | 1                                 | 1                                     | 1                          | 0                                    | 3                      | 1                                    | 1                             | 2                          | 1                         | 1                                     | 1                                   | 3                    | 8               |
| Kyrø, 2015         | 1                                 | 1                                     | 0                          | 1                                    | 3                      | 1                                    | 0                             | 1                          | 1                         | 1                                     | 1                                   | 3                    | 7               |
| Zhang, 2017        | 1                                 | 1                                     | 1                          | 1                                    | 4                      | 1                                    | 0                             | 1                          | 1                         | 1                                     | 1                                   | 3                    | 8               |
| Ho, 2021           | 1                                 | 1                                     | 1                          | 0                                    | 3                      | 1                                    | 1                             | 2                          | 1                         | 1                                     | 1                                   | 3                    | 8               |
| Woo, 2012          | 1                                 | 1                                     | 1                          | 1                                    | 4                      | 1                                    | 0                             | 1                          | 1                         | 1                                     | 1                                   | 3                    | 8               |
| Yang, 2023         | 1                                 | 1                                     | 1                          | 1                                    | 4                      | 1                                    | 0                             | 1                          | 0                         | 1                                     | 1                                   | 2                    | 7               |
| McCann, 2010       | 1                                 | 1                                     | 1                          | 1                                    | 4                      | 1                                    | 0                             | 1                          | 1                         | 1                                     | 1                                   | 3                    | 8               |
| Guglielmini 2012   | 1                                 | 1                                     | 1                          | 1                                    | 4                      | 1                                    | 0                             | 1                          | 1                         | 1                                     | 1                                   | 3                    | 8               |
| Seibold, 2014      | 1                                 | 1                                     | 1                          | 1                                    | 4                      | 1                                    | 1                             | 2                          | 1                         | 1                                     | 1                                   | 3                    | 9               |
| Buck, 2011a        | 1                                 | 1                                     | 1                          | 1                                    | 4                      | 1                                    | 1                             | 2                          | 1                         | 1                                     | 1                                   | 3                    | 9               |
| Buck, 2011b        | 1                                 | 1                                     | 1                          | 1                                    | 4                      | 1                                    | 1                             | 2                          | 1                         | 1                                     | 1                                   | 3                    | 9               |
| Olsen, 2011        | 1                                 | 1                                     | 1                          | 1                                    | 4                      | 1                                    | 0                             | 1                          | 1                         | 1                                     | 1                                   | 3                    | 8               |

|                 |   |   |   |   |   |   |   |   |   |   |   |   |   |
|-----------------|---|---|---|---|---|---|---|---|---|---|---|---|---|
| Kyø, 2018       | 1 | 1 | 1 | 1 | 4 | 1 | 1 | 2 | 1 | 1 | 1 | 3 | 9 |
| Jaskulski, 2018 | 1 | 1 | 1 | 1 | 4 | 1 | 1 | 2 | 1 | 1 | 1 | 3 | 9 |
| Jaskulski, 2020 | 1 | 1 | 1 | 1 | 4 | 1 | 1 | 2 | 1 | 1 | 1 | 3 | 9 |
| Nechuta, 2013   | 1 | 1 | 1 | 0 | 3 | 1 | 1 | 2 | 1 | 1 | 1 | 3 | 8 |
| Fink 2006       | 1 | 1 | 1 | 1 | 4 | 1 | 0 | 1 | 1 | 1 | 1 | 3 | 8 |
| Beasley, 2011   | 1 | 1 | 0 | 1 | 3 | 1 | 0 | 1 | 1 | 1 | 1 | 3 | 7 |
| Farvid, 2020    | 0 | 1 | 1 | 0 | 2 | 1 | 1 | 2 | 1 | 1 | 0 | 2 | 6 |
| Thomson, 2011   | 1 | 1 | 1 | 1 | 4 | 1 | 0 | 1 | 1 | 1 | 1 | 3 | 8 |
| Nakachi, 2000   | 1 | 1 | 1 | 1 | 4 | 1 | 1 | 2 | 0 | 1 | 0 | 1 | 7 |
| Inoue, 2001     | 1 | 1 | 1 | 1 | 4 | 1 | 0 | 1 | 1 | 1 | 1 | 3 | 8 |
| Bao, 2015       | 1 | 1 | 1 | 1 | 4 | 1 | 1 | 2 | 0 | 1 | 1 | 2 | 8 |

Supplementary Table 2 Nonlinear dose-response analysis of soy isoflavones and breast cancer survival outcomes

| Recurrence                 |                  | Breast-cancer-specific mortality |                  | All-cause mortality        |                  |
|----------------------------|------------------|----------------------------------|------------------|----------------------------|------------------|
| mg/d                       | HR (95% CI)      | mg/d                             | HR (95% CI)      | mg/d                       | HR (95% CI)      |
| 1.54                       | 1.00             | 0.1                              | 1.00             | 0.1                        | 1.00             |
| 10                         | 0.89 (0.81-0.97) | 10                               | 0.86 (0.75-0.99) | 10                         | 0.87 (0.72-1.06) |
| 20                         | 0.80 (0.67-0.95) | 20                               | 0.78 (0.63-0.98) | 20                         | 0.80 (0.59-1.08) |
| 30                         | 0.74 (0.60-0.93) | 30                               | 0.75 (0.56-1.01) | 30                         | 0.77 (0.55-1.08) |
| 40                         | 0.72 (0.56-0.92) | 40                               | 0.73 (0.51-1.07) | 40                         | 0.77 (0.55-1.06) |
| 50                         | 0.71 (0.55-0.91) | 50                               | 0.73 (0.46-1.17) | 50                         | 0.78 (0.58-1.04) |
| 60                         | 0.70 (0.55-0.90) | 60                               | 0.73 (0.41-1.30) | 60                         | 0.79 (0.61-1.02) |
| 70                         | 0.71 (0.55-0.90) | 70                               | 0.73 (0.37-1.46) | 70                         | 0.80 (0.63-1.01) |
| 80                         | 0.71 (0.55-0.91) | 80                               | 0.73 (0.33-1.64) | 80                         | 0.81 (0.64-1.02) |
| 90                         | 0.71 (0.55-0.91) | 90                               | 0.73 (0.29-1.85) | 90                         | 0.82 (0.64-1.05) |
| 100                        | 0.71 (0.54-0.92) | 100                              | 0.73 (0.26-2.09) | 100                        | 0.83 (0.64-1.09) |
| p <sub>non-linearity</sub> | 0.03             | p <sub>non-linearity</sub>       | 0.11             | p <sub>non-linearity</sub> | 0.22             |

Supplementary Table 3 Nonlinear dose-response analysis of dietary lignans and breast cancer survival outcomes

| Breast-cancer-specific mortality |                  | All-cause mortality |                  |
|----------------------------------|------------------|---------------------|------------------|
| mg/d                             | HR (95% CI)      | mg/d                | HR (95% CI)      |
| 0.1                              | 1.00             | 0.1                 | 1.00             |
| 1                                | 0.98 (0.63-1.53) | 1                   | 0.97 (0.70-1.34) |

|                            |                  |                            |                  |
|----------------------------|------------------|----------------------------|------------------|
| 2                          | 0.96 (0.46-2.03) | 2                          | 0.95 (0.55-1.65) |
| 3                          | 0.93 (0.38-2.31) | 3                          | 0.94 (0.49-1.82) |
| 4                          | 0.90 (0.33-2.41) | 4                          | 0.94 (0.47-1.87) |
| 5                          | 0.86 (0.30-2.45) | 5                          | 0.94 (0.48-1.87) |
| 6                          | 0.83 (0.27-2.52) | 6                          | 0.95 (0.48-1.87) |
| 7                          | 0.79 (0.24-2.64) | 7                          | 0.95 (0.48-1.86) |
| 8                          | 0.76 (0.21-2.81) | 8                          | 0.95 (0.48-1.87) |
| 9                          | 0.73 (0.18-3.02) | 9                          | 0.95 (0.48-1.88) |
| 10                         | 0.70 (0.15-3.27) | 10                         | 0.96 (0.48-1.89) |
| $P_{\text{non-linearity}}$ | 0.92             | $P_{\text{non-linearity}}$ | 0.86             |

Supplementary Table 4 Nonlinear dose-response analysis of serum/plasma enterolactone and breast cancer survival outcomes

| Recurrence |                  | Breast-cancer-specific mortality |                  | All-cause mortality |                  |
|------------|------------------|----------------------------------|------------------|---------------------|------------------|
| ng/L       | HR (95% CI)      | ng/L                             | HR (95% CI)      | ng/L                | HR (95% CI)      |
| 3.5        | 1.00             | 3.1                              | 1.00             | 3.1                 | 1.00             |
| 10         | 1.02 (0.88-1.19) | 10                               | 0.91 (0.73-1.12) | 10                  | 0.89 (0.76-1.05) |
| 20         | 1.03 (0.78-1.37) | 20                               | 0.83 (0.57-1.21) | 20                  | 0.81 (0.61-1.07) |
| 30         | 1.03 (0.73-1.44) | 30                               | 0.78 (0.50-1.21) | 30                  | 0.75 (0.55-1.04) |
| 40         | 1.00 (0.71-1.41) | 40                               | 0.75 (0.49-1.12) | 40                  | 0.72 (0.53-0.96) |
| 50         | 0.96 (0.69-1.33) | 50                               | 0.73 (0.52-1.02) | 50                  | 0.70 (0.54-0.89) |
| 60         | 0.91 (0.65-1.28) | 60                               | 0.72 (0.52-0.98) | 60                  | 0.68 (0.53-0.88) |

|                            |                  |                            |                  |                            |                  |
|----------------------------|------------------|----------------------------|------------------|----------------------------|------------------|
| 70                         | 0.86 (0.58-1.29) | 70                         | 0.71 (0.47-1.07) | 70                         | 0.68 (0.47-0.98) |
| P <sub>non-linearity</sub> | 0.61             | P <sub>non-linearity</sub> | 0.68             | P <sub>non-linearity</sub> | 0.55             |

Supplementary Table 5 Nonlinear dose-response analysis of cruciferous vegetables and breast cancer survival outcomes

| Breast-cancer-specific mortality |                  | All-cause mortality        |                   |
|----------------------------------|------------------|----------------------------|-------------------|
| g/d                              | HR (95% CI)      | g/d                        | HR (95% CI)       |
| 7.8                              | 1.00             | 5.7                        | 1.00              |
| 10                               | 1.04 (0.95-1.13) | 10                         | 1.02 (0.96-1.08)  |
| 20                               | 1.08 (0.91-1.28) | 20                         | 1.03 (0.92-1.16)  |
| 30                               | 1.11 (0.87-1.41) | 30                         | 1.05 (0.89-1.23)  |
| 40                               | 1.13 (0.85-1.51) | 40                         | 1.05 (0.87-1.28)  |
| 50                               | 1.15 (0.84-1.57) | 50                         | 1.06 (0.86-1.29)  |
| 60                               | 1.15 (0.84-1.59) | 60                         | 1.05 (0.86-1.29)  |
| 70                               | 1.16 (0.84-1.59) | 70                         | 1.05 (0.87-1.27)  |
| 80                               | 1.15 (0.85-1.57) | 80                         | 1.05 (0.87-1.26)  |
| 90                               | 1.15 (0.86-1.54) | 90                         | 1.04 (0.897-1.25) |
| P <sub>non-linearity</sub>       | 0.46             | P <sub>non-linearity</sub> | 0.58              |

**A Dietary lignans and breast cancer-specific mortality, high vs. low**

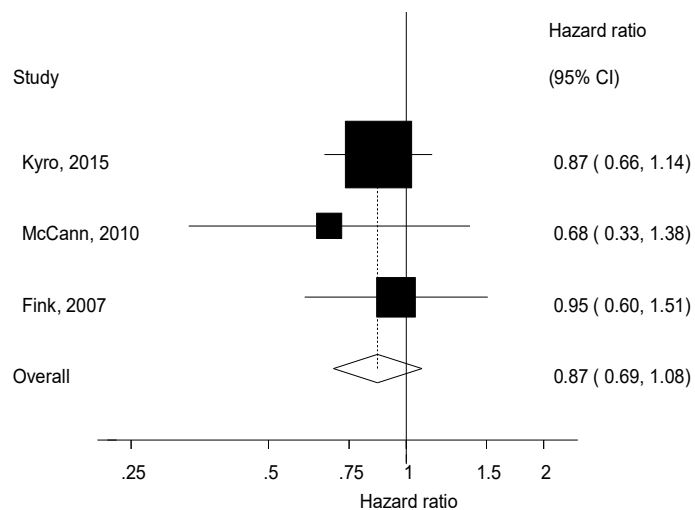

**C Dietary lignans and all-cause mortality, high vs. low**

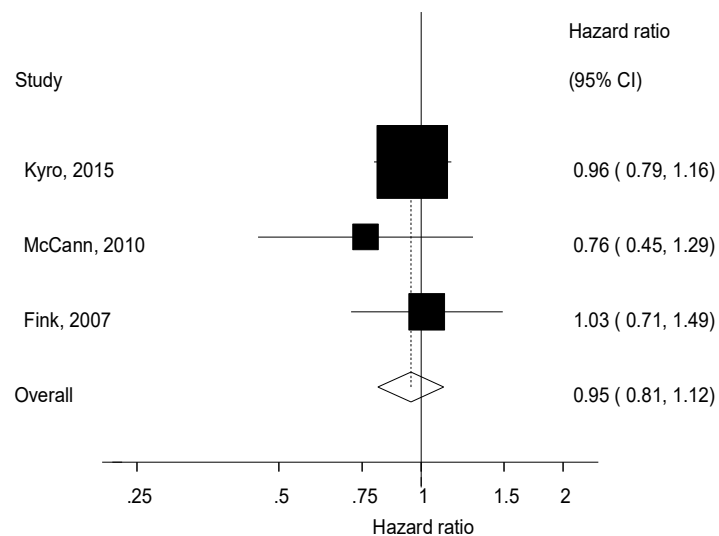

**B Dietary lignans and breast cancer-specific mortality, nonlinear dose-response**

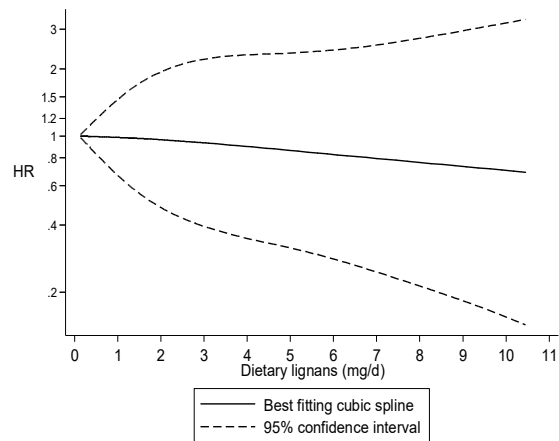

**D Dietary lignans and all-cause mortality, nonlinear dose-response**

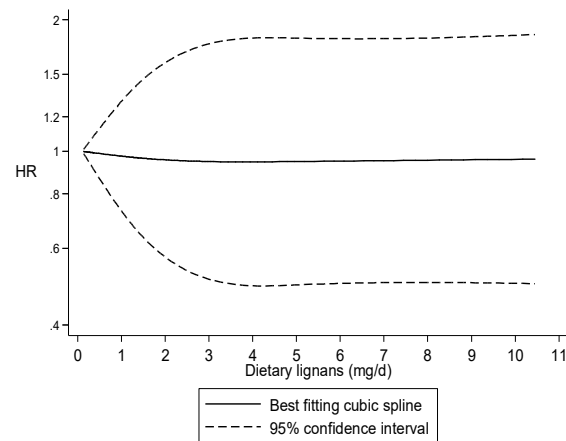

Supplementary Figure 1: Forest plots for intake of lignans high versus low analyses and risk of breast cancer recurrence, breast cancer-specific mortality and all-cause mortality, with graphs illustrating non-linear dose-response

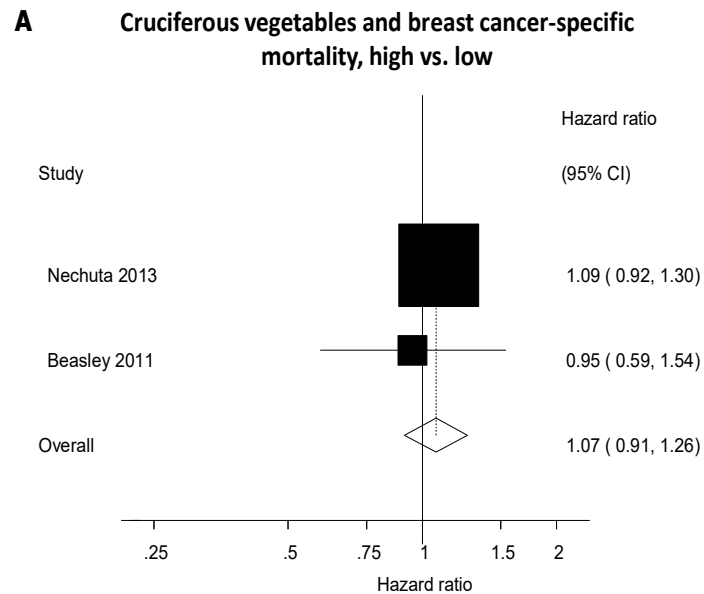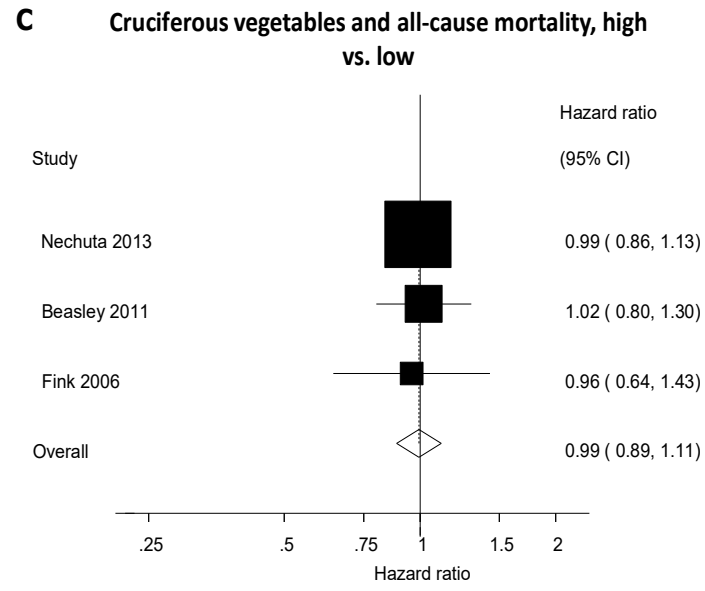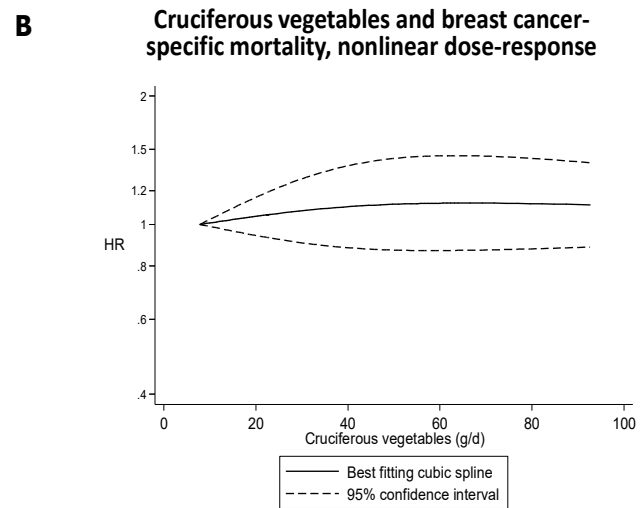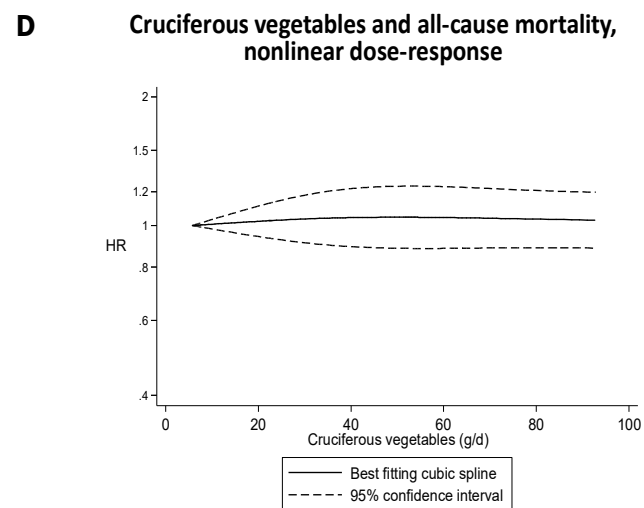

Supplementary Figure 2: Forest plots for intake of cruciferous vegetables high versus low analyses and risk of breast cancer recurrence, breast cancer-specific mortality and all-cause mortality, with graphs illustrating non-linear dose-response

a. Recurrence

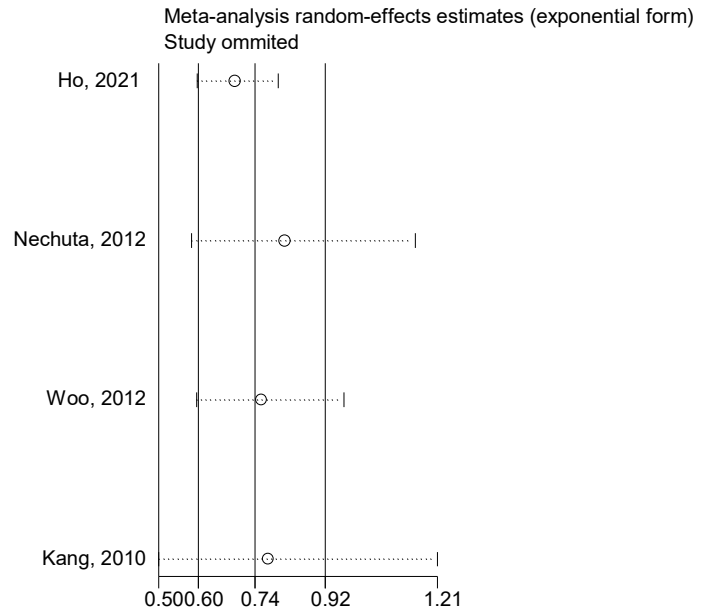

| Study omitted | e^coef.    | [95% Conf. Interval] |            |
|---------------|------------|----------------------|------------|
| Ho, 2021      | 0.68962014 | 0.59399378           | 0.80064124 |
| Nechuta, 2012 | 0.81694788 | 0.58018762           | 1.1503242  |
| Woo, 2012     | 0.7574411  | 0.59211063           | 0.96893543 |
| Kang, 2010    | 0.77422225 | 0.49646565           | 1.2073747  |
| Combined      | 0.74157663 | 0.59689718           | 0.92132434 |

b. Breast cancer-specific mortality

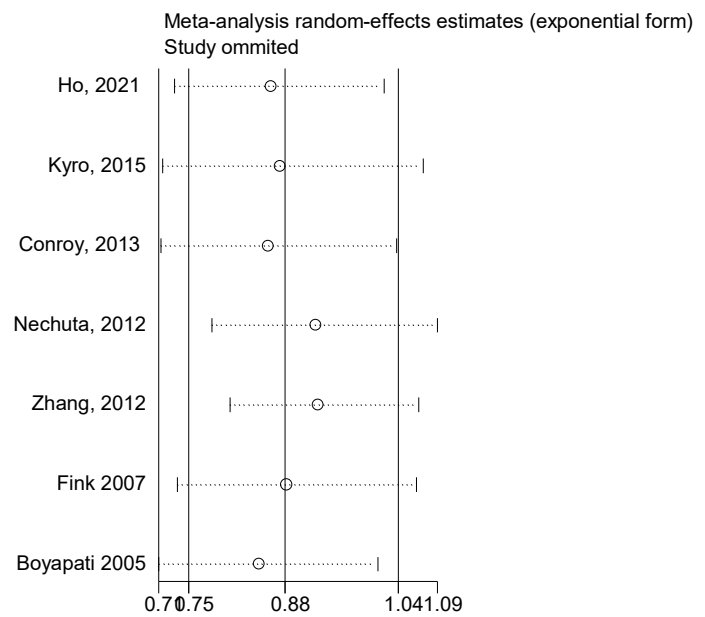



| Study omitted | e^coef.    | [95% Conf. Interval] |           |
|---------------|------------|----------------------|-----------|
| Ho, 2021      | 0.86360025 | 0.7330606            | 1.0173857 |
| Kyro, 2015    | 0.87589234 | 0.71678215           | 1.0703214 |
| Conroy, 2013  | 0.85940588 | 0.71403396           | 1.0343744 |
| Nechuta, 2012 | 0.92380369 | 0.78326935           | 1.0895528 |
| Zhang, 2012   | 0.92707086 | 0.80772734           | 1.0640477 |
| Fink 2007     | 0.884148   | 0.73662162           | 1.0612202 |
| Boyapati 2005 | 0.84727395 | 0.7115609            | 1.008871  |
| Combined      | 0.88285381 | 0.75210681           | 1.03633   |

c. All-cause mortality

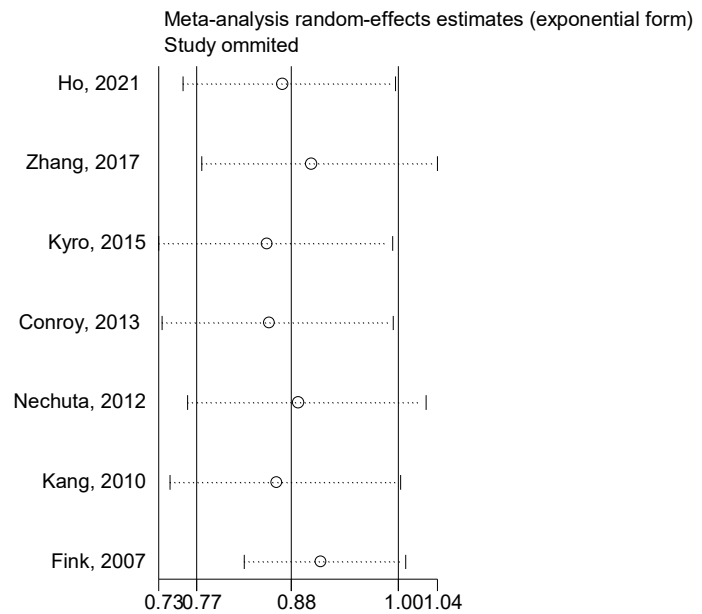

| Study omitted | e^coef.    | [95% Conf. Interval] |            |
|---------------|------------|----------------------|------------|
| Ho, 2021      | 0.86843401 | 0.75861913           | 0.99414527 |
| Zhang, 2017   | 0.90027058 | 0.77901298           | 1.0404025  |
| Kyro, 2015    | 0.85160452 | 0.73184401           | 0.99096286 |
| Conroy, 2013  | 0.85384554 | 0.73517835           | 0.99166709 |
| Nechuta, 2012 | 0.88579416 | 0.76364309           | 1.0274843  |
| Kang, 2010    | 0.86227417 | 0.74380189           | 0.99961674 |
| Fink, 2007    | 0.91122103 | 0.82617182           | 1.0050256  |
| Combined      | 0.87842724 | 0.77384353           | 0.99714528 |

Supplementary Figure 3: Influence analysis for high vs. low soy isoflavones and (a) recurrence; (b) breast cancer-specific mortality; (c) all-cause mortality
